# Supplementary material for: Photocatalytic reactivity of {121} and {211} facets of brookite TiO2 crystals
Source: Royal Society of Chemistry journal article supplement (doi:10.1039/c4ta06087c), 2014-11-28
Supplement: c4ta06087c1.pdf [file c4ta06087c1.pdf]

## Supporting information

# Photocatalytic Reactivity of {121} and {211} Facets of Brookite TiO<sub>2</sub> Crystals

Ming Zhao,<sup>ab</sup> Hua Xu,<sup>\*ab</sup> Hungru Chen,<sup>c</sup> Shuxin Ouyang,<sup>ab</sup> Naoto Umezawa,<sup>acd</sup> Defa Wang<sup>ab</sup> and Jinhua Ye<sup>\*abc</sup>

<sup>a</sup> TU-NIMS Joint Research Center, Key Lab of Advanced Ceramics and Machining Technology of Ministry of Education, School of Materials Science and Engineering, Tianjin University, 92 Weijin Road, Nankai District, Tianjin 300072, P.R. China

<sup>b</sup> Collaborative Innovation Center of Chemical Science and Engineering (Tianjin), Tianjin 30072, P.R. China

<sup>c</sup> Environmental Remediation Materials Unit, International Center for Materials Nanoarchitectonics (WPI-MANA), National Institute for Materials Science (NIMS), 1-1 Namiki, Tsukuba 305-0044, Japan

<sup>d</sup> PRESTO, Japan Science and Technology Agency (JST), 4-1-8 Honcho Kawaguchi, Saitama 332-0012, Japan

E-mail: [xuhua@tju.edu.cn](mailto:xuhua@tju.edu.cn); [Jinhua.YE@nims.go.jp](mailto:Jinhua.YE@nims.go.jp).

## Supporting Figures

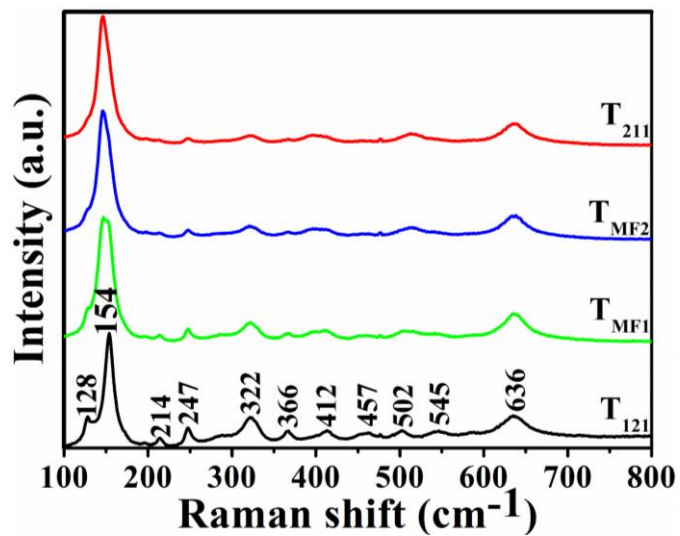

**Fig. S1** Raman spectra of  $T_{121}$ ,  $T_{MF1}$ ,  $T_{MF2}$  and  $T_{211}$ .

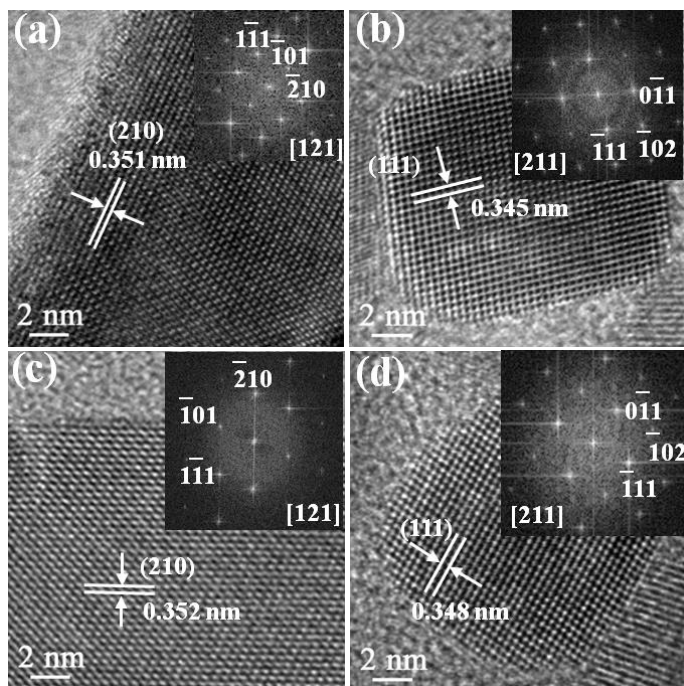

**Fig. S2** (a, b) HRTEM image and FFT pattern (inset) of  $T_{MF1}$ . (c, d) HRTEM image and FFT pattern (inset) of  $T_{MF2}$ .

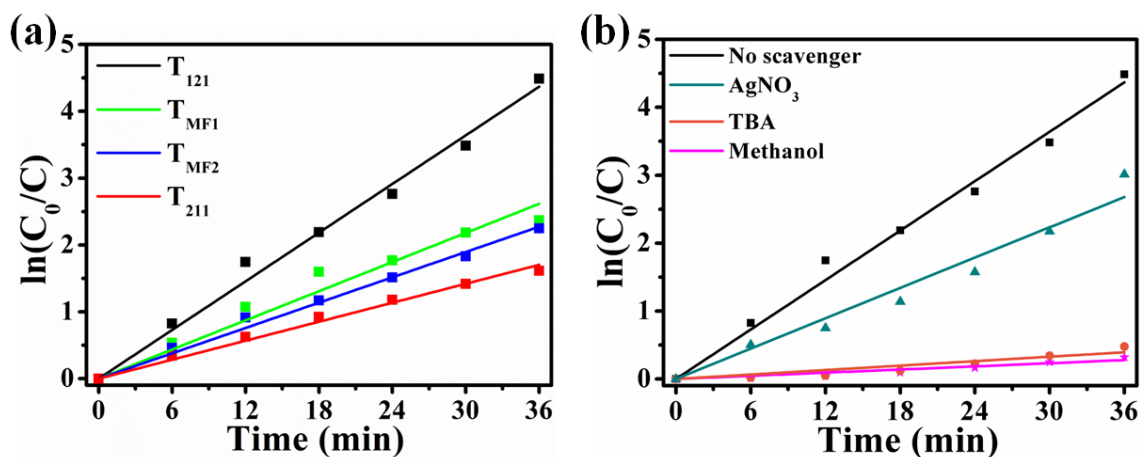

**Fig. S3** (a) The pseudo-first-order degradation rate constants of RhB over the brookite  $\text{TiO}_2$  samples under UV-visible light irradiation ( $\lambda > 300$  nm). (b) The pseudo-first-order degradation rate constants of RhB over  $\text{Ti}_{121}$  in the presence of various scavengers under UV-visible light irradiation ( $\lambda > 300$  nm).

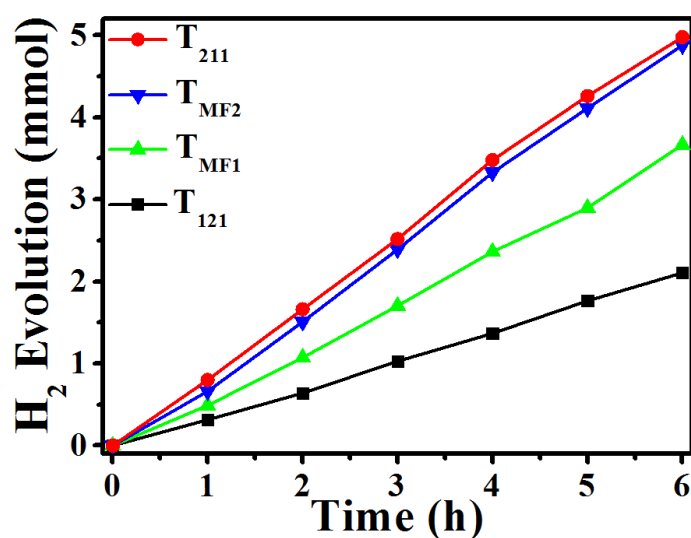

**Fig. S4** Comparison of photocatalytic activities of  $\text{H}_2$  evolution over 0.5% Pt-loaded  $\text{TiO}_2$  samples with the same mass of 100 mg under UV-visible light irradiation ( $\lambda > 300$  nm).

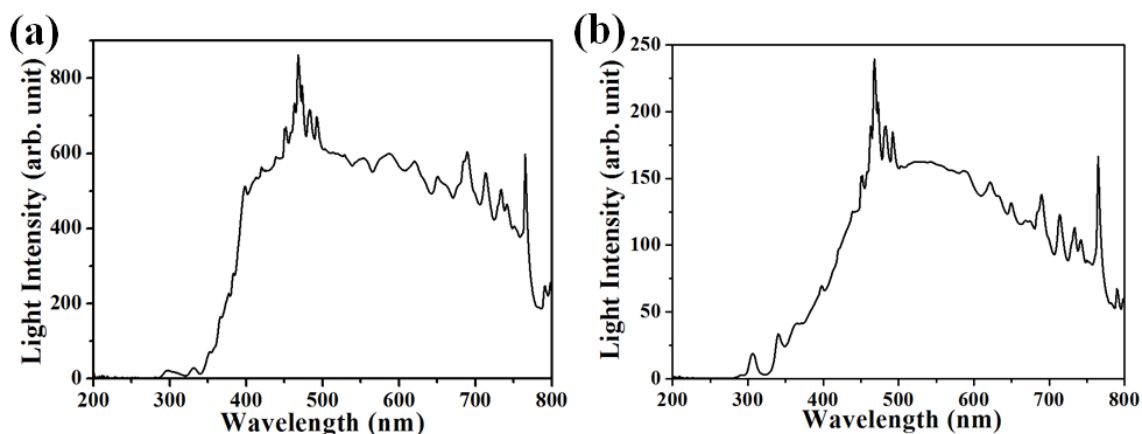

**Fig. S5** Light spectra of the Xe lamp (a) and AM 1.5 solar simulation (b).
